# Supplementary material for: Identification of Kic1p and Cdc42p as Novel Targets to Engineer Yeast Acetic Acid Stress Tolerance
Source: Frontiers journal article supplement (doi:10.3389/fbioe.2022.837813), 2022-03-25
Supplement: Image_1.pdf [file Image_1.pdf]

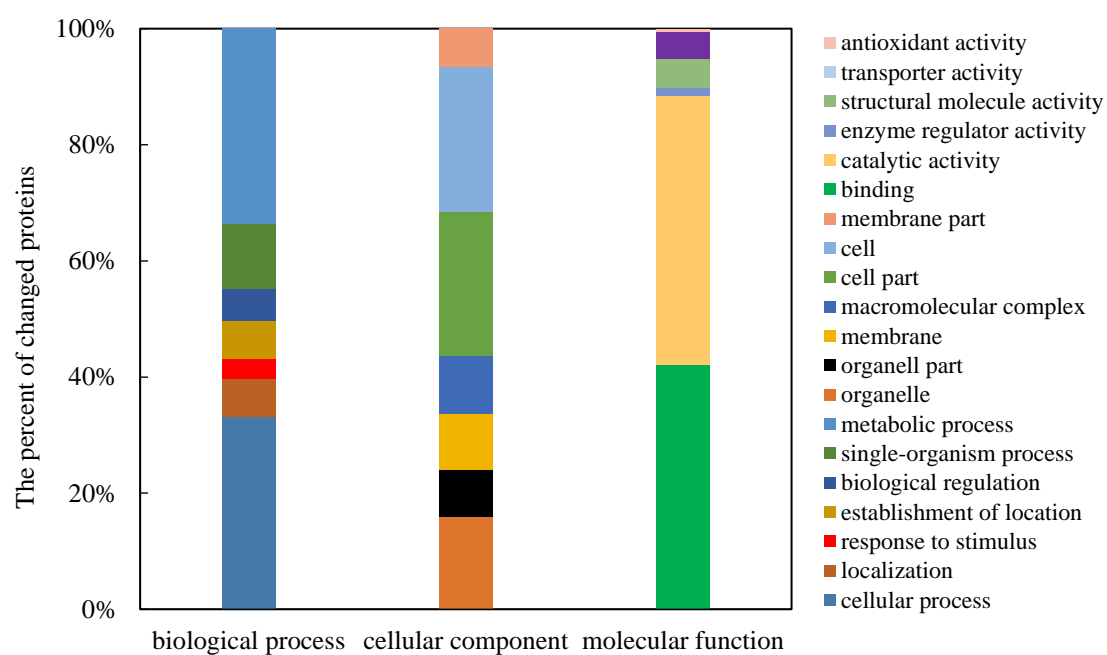

**Fig. S1**
